# Supplementary material for: Compositional variation and zoning of epidote supergroup minerals in the Campi Flegrei geothermal field, Naples, Italy
Source: Copernicus journal article supplement (doi:10.5194/ejm-35-25-2023), 2023-01-06
Supplement: Supplementary file 1 [file ejm-35-25-2023-supplement.zip]

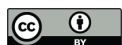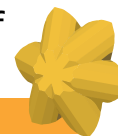

*Supplement of*

**Compositional variation and zoning of epidote supergroup minerals in the Campi Flegrei geothermal field, Naples, Italy**

**Harvey E. Belkin and Benedetto De Vivo**

*Correspondence to:* Harvey E. Belkin ([harveybelkin@gmail.com](mailto:harveybelkin@gmail.com))

- [ejm-35-25-2023-supplement-title-page.pdf](#)
- [Supplementary Tables.xlsx](#)

The copyright of individual parts of the supplement might differ from the article licence.
