# Supplementary material for: Compositional variation and zoning of epidote supergroup minerals in the Campi Flegrei geothermal field, Naples, Italy
Source: Copernicus journal article supplement (doi:10.5194/ejm-35-25-2023), 2023-01-06
Supplement: Supplementary file 1 [file Supplementary Tables.xlsx]

## Sheet: MF1
Supplementary Tables for "Compositional variation and zoning of epidote supergroup minerals in the Campi Flegrei geothermal field, Naples, Italy": Harvey E. Belkin and Benedetto De Vivo
Compositions of epidote and clinozoisite from the MF1 samples
Analysis	MF1-1597 xl.F	MF1-1597 xl.C	MF1-1597 xl.B	MF1-1597 xl.E	MF1-1597 xl.D	MF1-1597 TRV	MF1-1495	MF1-1597#20	MF1-1597xl.A	MF1-1597 Xl.E	MF1-1597 xl.F	MF1-1597 xl.C	MF1-1398 xl.C	MF1-1398 xl.B	MF1-1398 xl.A	MF1-1597 xl.D	MF1-1150 xl.1	MF1-1150 xl.2	MF1-1597#21	MF1-1150 xl.3	MF1-1150#50	MF1-1150#48	MF1-1150 xl.2	MF1-1150#49
Depth m	1597	1597	1597	1597	1597	1597	1495	1597	1597	1597	1597	1597	1398	1398	1398	1597	1150	1150	1597	1150	1150	1150	1150	1150
Comment	low Z	rim		low Z	rim		xls. In vug			high Z	high Z	core				core		rim					core	core
Figure and spot	Fig. 8d-J										Fig. 8d-K
n =	2	1	3	1	2	5	3	1	3	2	3	1	3	2	4	1	3	2	1	3	1	1	1	1
Mineral	czo	czo	czo	ep	ep	ep	ep	ep	ep	ep	ep	ep	ep	ep	ep	ep	ep	ep	ep	ep	ep	ep	ep	ep
SiO2 (wt%)	38.52	38.18	39.19	38.37	37.68	37.52	37.4	37.85	37.97	37.71	37.54	37.98	38.14	37.77	38.46	37.76	37.35	37.75	37.59	37.5	38.22	37.44	37.06	37.5
TiO2	bdl	0.08	0.08	0.3	0.19	0.2	0.18	0.09	0.09	0.42	bdl	0.16	0.02	0.04	0.04	0.05	bdl	bdl	0.03	bdl	bdl	bdl	bdl	bdl
Al2O3	27.45	27.63	27.4	26.32	26.91	25.91	25.48	25.15	25.24	23.68	24.59	24.45	24.42	24.13	24.02	24.5	23.45	23.44	23.56	22.76	21.95	21.66	21.61	21.3				`
FeO*	7.07	8.06	8.19	8.89	8.72	8.68	9.52	10.62	10.44	11.2	10.97	11.36	10.95	11.19	11.27	11.6	11.98	12.19	12.45	12.7	13.52	13.97	14.31	14.49
MgO	0.11	bdl	0.05	bdl	0.06	0.13	0.37	0.06	0.06	0.03	0.12	0.04	0.06	0.17	0.2	0.02	0.11	0.09	0.14	0.14	0.17	0.17	0.12	0.16
MnO	0.18	1.93	0.28	0.28	0.72	0.59	1.16	2	0.57	0.39	0.32	0.24	0.42	0.39	0.38	0.26	0.14	0.2	0.55	0.24	0.18	0.11	0.16	0.12
CaO	23.82	21.59	23.52	23.07	22.71	23.17	22.09	21.5	23.18	22.93	23.5	23.03	23.61	23.58	23.67	23.03	23.76	23.51	23.08	23.61	23.75	23.87	23.6	23.5
SrO	0.16	0.21	0.13	0.08	0.12	bdl	bdl	bdl	0.11	bdl	0.14	0.06	0.08	0.06	0.08	0.22	bdl	0.13	bdl	0.09	0.18	0.14	0.06	0.11
Na2O	bdl	bdl	bdl	bdl	bdl	bdl	bdl	bdl	bdl	bdl	bdl	0.02	bdl	bdl	bdl	bdl	bdl	bdl	bdl	bdl	bdl	bdl	bdl	bdl
K2O	bdl	bdl	bdl	bdl	0.03	bdl	bdl	bdl	bdl	bdl	bdl	bdl	bdl	bdl	bdl	bdl	bdl	bdl	bdl	bdl	bdl	bdl	bdl	bdl
Y2O3	bdl	bdl	bdl	bdl	bdl	bdl	bdl	bdl	bdl	0.08	bdl	bdl	bdl	bdl	bdl	bdl	bdl	bdl	bdl	bdl	bdl	bdl	bdl	bdl
ThO2	bdl	bdl	bdl	bdl	bdl	bdl	bdl	bdl	bdl	bdl	bdl	bdl	bdl	bdl	bdl	bdl	bdl	bdl	bdl	bdl	bdl	bdl	bdl	bdl
Total	97.3	97.68	98.84	97.31	97.14	96.2	96.2	97.27	97.66	96.44	97.18	97.34	97.7	97.33	98.12	97.44	96.79	97.31	97.4	97.04	97.97	97.36	96.92	97.18
Formulae on the basis of (T+M+A) = 8 cations
Si	3.001	2.982	3.015	3.008	2.956	2.972	2.97	2.99	2.978	3.008	2.962	2.996	2.995	2.978	3.009	2.978	2.966	2.986	2.972	2.979	3.017	2.976	2.961	2.991
Ti	0	0.005	0.005	0.018	0.011	0.012	0.011	0.005	0.005	0.025	0	0.009	0.001	0.002	0.002	0.003	0	0	0.002	0	0	0	0	0											`
Al	2.52	2.543	2.485	2.432	2.488	2.419	2.385	2.342	2.333	2.226	2.286	2.273	2.26	2.242	2.215	2.277	2.195	2.185	2.195	2.131	2.042	2.029	2.035	2.002
Fe3+	0.461	0.484	0.476	0.517	0.572	0.575	0.632	0.667	0.685	0.704	0.724	0.72	0.719	0.738	0.737	0.76	0.796	0.806	0.823	0.844	0.892	0.929	0.956	0.967
Fe2+	0	0.043	0.051	0.066	0	0	0	0.035	0	0.044	0	0.029	0	0	0	0.005	0	0	0	0	0	0	0	0												`
Mg	0.013	0	0.006	0	0.007	0.015	0.044	0.007	0.007	0.004	0.014	0.005	0.007	0.02	0.023	0.002	0.013	0.011	0.016	0.017	0.02	0.02	0.014	0.019
Mn	0.012	0.128	0.018	0.019	0.048	0.04	0.078	0.134	0.038	0.026	0.021	0.016	0.028	0.026	0.025	0.017	0.009	0.013	0.037	0.016	0.012	0.007	0.011	0.008
Ca	1.988	1.807	1.939	1.938	1.909	1.967	1.88	1.82	1.948	1.96	1.986	1.946	1.986	1.992	1.984	1.946	2.022	1.992	1.955	2.01	2.009	2.033	2.02	2.008
Sr	0.007	0.01	0.006	0.004	0.005	0	0	0	0.005	0	0.006	0.003	0.004	0.003	0.004	0.01	0	0.006	0	0.004	0.008	0.006	0.003	0.005
Na	0	0	0	0	0	0	0	0	0	0	0	0.003	0	0	0	0	0	0	0	0	0	0	0	0
K	0	0	0	0	0.003	0	0	0	0	0	0	0	0	0	0	0	0	0	0	0	0	0	0	0
Y	0	0	0	0	0	0	0	0	0	0.003	0	0	0	0	0	0	0	0	0	0	0	0	0	0
Th	0	0	0	0	0	0	0	0	0	0	0	0	0	0	0	0	0	0	0	0	0	0	0	0
XFe	0.154646	0.159894	0.160757	0.175314	0.186928	0.192051	0.20948	0.22	0.226972	0.240273	0.240532	0.240561	0.241356	0.247651	0.249661	0.250247	0.266132	0.269475	0.27	0.283697	0.304022	0.314064	0.319626	0.325699
FeO* = total iron as Fe2+; bdl = below detection limit; n = number of analyses averaged; XFe = (Fe3+)/(Fe3++Al) apfu; ep = epidote, czo = clinozoisite; Fe3+/Fe2+ calculated on the basis of stoichiometry; Z = average atomic number

## Sheet: MF2
Compositions of epidote and clinozoisite from the MF2 samples.
Analysis	MF2-1960 xl.11	MF2-1960	MF2-1824.14xl.B	MF2-1960#15	MF2-1715 xl.4a	MF2-1960#16 xl.2	MF2-1824.15xl.B	MF2-1715 xl.J	MF2-1824	MF2-1715 xl.J	MF2-1715 xl.J	MF2-1960	MF2-1715 xl.J	MF2-1960	MF2-1824	MF2-1824	MF2-1824v	MF2-1960 xl.11	MF2-1960	MF2-1960#14 xl.2	MF2-1824	MF2-1824.5 xl.2	MF2-1715 xl. 4b	MF2-1715 xl.J	MF2-1960#14 xl.1	MF2-1824.4 xl.2	MF2-1715 xl.J	MF2-1824.13xl.B	MF2-1582.9	MF2-1715#22 xl.3	MF2-1715 xl.4a	MF2-1824.6 xl.2	MF2-1715 xl. 2	MF2-1824v	MF2-1960	MF2-1824#20 xl.1	MF2-1715 xl.3	MF2-1715#24 xl.3	MF2-1582chip1 xl.A	MF2-1824.7 xl.3
Depth m	1960	1960	1824	1960	1715	1960	1824	1715	1824	1715	1715	1960	1715	1960	1824	1824	1824	1960	1960	1960	1824	1824	1715	1715	1960	1824	1715	1824	1582	1715	1715	1824	1715	1824	1960	1824	1715	1715	1582	1824
Comment	low Z		low Z	low Z zone	low Z	low Z zone	intermediate Z	low Z		low Z	low Z		high Z				vein, low Z	high Z		intermediate Z		intermediate Z	zoned	high Z	high Z	zoned	high Z	high Z edge		low Z	high Z	high Z core		vein, high Z		high Z		high Z core
Figure and spot			Fig. 8b-G				Fig. 8b-H																					Fig. 8b-I
n =	1	1	1	1	1	1	1	1	1	1	1	1	1	1	1	1	2	2	1	1	1	1	2	1	1	1	1	3	3	1	1	1	2	6	1	1	3	1	5	1
Mineral	czo	czo	czo	czo	czo	czo	czo	czo	czo	czo	czo	czo	ep	ep	ep	ep	ep	ep	ep	ep	ep	ep	ep	ep	ep	ep	ep	ep	ep	ep	ep	ep	ep	ep	ep	ep	ep	ep	ep	ep
SiO2 (wt%)	39.51	38.61	39.3	38.61	38.21	38.08	39.18	38.13	38.07	37.93	37.86	38.09	38.5	37.86	37.71	38.21	38.66	38.835	38.72	37.57	37.84	38.82	38.14	37.82	37.54	38.47	38	38.49	38.47	37.33	37.63	38.85	37.56	38.51	38.43	36.97	38.45	36.84	36.99	38.03
TiO2	0.14	0.18	0.16	0.08	0.15	0.05	0.05	0.03	0.04	0.02	0.02	0.08	0.02	bdl	0.08	0.05	0.02	0.125	0.07	bdl	0.03	bdl	0.09	0.05	bdl	bdl	0.06	0.05	bdl	bdl	0.1	bdl	0.05	0.05	0.34	bdl	0.11	0.26	0.02	0.08
Al2O3	29.2	28.86	28.5	28.46	29.72	28.3	27.99	27.84	27.56	27.86	26.85	27.06	26.88	26.72	26.18	26.52	26.42	25.925	26	25.99	25.65	25.74	26.59	25.53	26.04	25	26.15	24.97	24.68	25.25	25.74	25.02	25.46	24.9	24.41	24.78	24.69	23.32	23.76	22.7
FeO*	6.46	5.73	6.25	5.82	6.13	6.3	7.36	6.73	7	7.54	7.32	7.46	8.49	7.98	7.92	8.05	9.16	9.455	9.58	9.17	9.14	9.86	9.49	9.15	9.7	10.64	10.08	10.47	10.49	9.97	10.35	11.31	10.36	11.09	11.04	10.81	11.2	11.53	11.77	13.06
MgO	bdl	0.28	bdl	0.09	0.03	0.07	bdl	0.32	0.31	0.03	0.34	0.29	0.04	0.26	0.28	0.35	bdl	0.03	bdl	0.05	0.28	bdl	0.1	0.37	0.06	bdl	0.04	bdl	0.12	0.1	0.09	bdl	0.07	0.02	0.06	0.08	0.06	0.26	0.18	bdl
MnO	0.17	0.44	0.17	0.78	0.1	0.11	0.21	0.63	0.27	0.51	0.73	0.37	0.64	0.35	0.34	0.16	0.79	0.475	0.04	1.33	0.12	0.24	0.15	0.42	0.75	1.26	1.42	0.67	0.64	0.9	0.08	0.69	1.28	0.54	0.48	0.54	0.2	0.12	0.72	0.32
CaO	23.61	23.05	23.71	24.72	23.91	25.25	23.54	22.62	23.09	23.52	22.8	23.12	22.81	23.13	22.9	23.25	22.5	23.295	23.69	23.63	23.19	23.42	23.6	22.81	23.45	21.97	22.08	22.84	22.59	24.37	23.72	22.6	21.83	22.68	23.2	24.04	23.53	25.08	22.8	22.29
SrO	0.08	bdl	0.14	bdl	0.14	bdl	0.17	bdl	bdl	0.25	bdl	bdl	0.29	bdl	bdl	bdl	0.22	0.06	0.1	bdl	bdl	0.19	0.09	bdl	bdl	0.31	0.49	0.1	0.22	bdl	0.09	0.1	0.4	0.18	0.07	bdl	0.07	bdl	0.46	0.55
Na2O	bdl	bdl	bdl	bdl	bdl	bdl	bdl	bdl	bdl	bdl	bdl	bdl	bdl	bdl	bdl	bdl	bdl	bdl	0.02	bdl	bdl	bdl	bdl	bdl	bdl	bdl	bdl	bdl	0.02	bdl	bdl	bdl	bdl	0.04	bdl	bdl	bdl	bdl	bdl	bdl
K2O	bdl	bdl	bdl	bdl	bdl	bdl	bdl	bdl	bdl	bdl	bdl	bdl	bdl	bdl	bdl	bdl	bdl	bdl	bdl	bdl	bdl	bdl	bdl	bdl	bdl	bdl	bdl	bdl	bdl	bdl	bdl	0.05	0.17	bdl	bdl	bdl	bdl	bdl	bdl	bdl
Y2O3	bdl	bdl	bdl	bdl	bdl	bdl	bdl	bdl	bdl	bdl	bdl	bdl	bdl	bdl	bdl	bdl	bdl	bdl	bdl	bdl	bdl	bdl	bdl	bdl	bdl	bdl	bdl	bdl	bdl	bdl	bdl	bdl	bdl	bdl	bdl	bdl	bdl	bdl	bdl	bdl
ThO2	bdl	bdl	bdl	bdl	bdl	bdl	bdl	bdl	bdl	bdl	bdl	bdl	bdl	bdl	bdl	bdl	bdl	bdl	bdl	bdl	bdl	bdl	bdl	bdl	bdl	0.13	bdl	bdl	bdl	bdl	bdl	bdl	bdl	bdl	bdl	bdl	bdl	bdl	bdl	bdl
Total	99.17	97.15	98.23	98.56	98.39	98.16	98.5	96.3	96.34	97.66	95.92	96.47	97.67	96.3	95.41	96.59	97.8	98.2	98.22	97.74	96.25	98.27	98.25	96.15	97.54	97.78	98.32	97.59	97.23	97.92	97.8	98.62	97.18	98.01	98.03	97.22	98.31	97.41	96.7	97.03
Formulae on the basis of (T+M+A) =8 cations
Si	3.013	2.998	3.027	2.96	2.931	2.929	3.018	2.995	2.99	2.949	2.993	2.993	3.005	2.984	3.002	3.003	3.019	3.0215	3.009	2.935	2.994	3.021	2.96	2.997	2.939	3.028	2.966	3.024	3.034	2.915	2.941	3.026	2.966	3.016	3.012	2.912	3.001	2.903	2.947	3.035
Ti	0.008	0.011	0.009	0.005	0.009	0.003	0.003	0.002	0.002	0.001	0.001	0.005	0.001	0	0.005	0.003	0.001	0.007	0.004	0	0.002	0	0.005	0.003	0	0	0.004	0.003	0	0	0.006	0	0.003	0.003	0.02	0	0.006	0.015	0.001	0.005
Al	2.624	2.641	2.587	2.571	2.687	2.566	2.541	2.578	2.551	2.553	2.502	2.506	2.472	2.482	2.456	2.456	2.432	2.377	2.381	2.393	2.392	2.361	2.432	2.385	2.403	2.319	2.405	2.312	2.294	2.324	2.371	2.297	2.37	2.298	2.255	2.301	2.271	2.166	2.231	2.135
Fe3+	0.335	0.343	0.34	0.373	0.393	0.405	0.417	0.428	0.46	0.49	0.484	0.49	0.516	0.526	0.527	0.529	0.532	0.565	0.595	0.599	0.605	0.598	0.616	0.606	0.635	0.621	0.656	0.633	0.64	0.651	0.676	0.657	0.684	0.671	0.682	0.712	0.715	0.76	0.784	0.785
Fe2+	0.077	0.029	0.062	0	0	0	0.057	0.014	0	0	0	0	0.038	0	0	0	0.066	0.05	0.027	0	0	0.044	0	0	0	0.079	0.002	0.055	0.052	0	0	0.08	0	0.055	0.042	0	0.016	0	0	0.087
Mg	0	0.032	0	0.01	0.003	0.008	0	0.037	0.036	0.003	0.04	0.034	0.005	0.031	0.033	0.041	0	0.0035	0	0.006	0.033	0	0.012	0.044	0.007	0	0.005	0	0.014	0.012	0.01	0	0.008	0.002	0.007	0.009	0.007	0.031	0.021	0
Mn	0.011	0.029	0.011	0.051	0.006	0.007	0.014	0.042	0.018	0.034	0.049	0.025	0.042	0.023	0.023	0.011	0.052	0.0315	0.003	0.088	0.008	0.016	0.01	0.028	0.05	0.084	0.094	0.045	0.043	0.06	0.005	0.046	0.086	0.036	0.032	0.036	0.013	0.008	0.049	0.022
Ca	1.929	1.918	1.957	2.03	1.965	2.081	1.943	1.904	1.943	1.959	1.931	1.947	1.907	1.953	1.953	1.958	1.883	1.942	1.973	1.978	1.966	1.953	1.962	1.937	1.967	1.853	1.846	1.923	1.909	2.039	1.986	1.886	1.847	1.903	1.948	2.029	1.968	2.117	1.946	1.906
Sr	0.004	0	0.006	0	0.006	0	0.008	0	0	0.011	0	0	0.013	0	0	0	0.01	0.002	0.005	0	0	0.009	0.004	0	0	0.014	0.022	0.005	0.01	0	0.004	0.005	0.018	0.008	0.003	0	0.003	0	0.021	0.025
Na	0	0	0	0	0	0	0	0	0	0	0	0	0	0	0	0	0.005	0	0.003	0	0	0	0	0	0	0	0	0	0.003	0	0	0	0	0.006	0	0	0	0	0	0
K	0	0	0	0	0	0	0	0	0	0	0	0	0	0	0	0	0	0	0	0	0	0	0	0	0	0	0	0	0	0	0	0.005	0.017	0	0	0	0	0	0	0
Y	0	0	0	0	0	0	0	0	0	0	0	0	0	0	0	0	0	0	0	0	0	0	0	0	0	0	0	0	0	0	0	0	0	0	0	0	0	0	0	0
Th	0	0	0	0	0	0	0	0	0	0	0	0	0	0	0	0	0	0	0	0	0	0	0	0	0	0.002	0	0	0	0	0	0	0	0	0	0	0	0	0	0
XFe	0.113214	0.114946	0.11616	0.126698	0.127597	0.136318	0.140974	0.142382	0.152773	0.161025	0.16209	0.163551	0.172691	0.174867	0.176668	0.177219	0.179487	0.192046	0.199933	0.200201	0.201869	0.202095	0.2021	0.202608	0.209019	0.211224	0.214309	0.214941	0.218132	0.218824	0.221858	0.22241	0.223969	0.226002	0.23221	0.236309	0.239451	0.25974	0.260033	0.268836
FeO* = total iron as Fe2+; bdl = below detection limit; n = number of analyses averaged; XFe = (Fe3+)/(Fe3++Al) apfu; ep = epidote, czo = clinozoisite; Fe3+/Fe2+ calculated on the basis of stoichiometry; Z = average atomic number

## Sheet: MF5
Compositions of epidote and clinozoisite from the MF5 samples.
Analysis	MF5-2605.3	MF5-2605.2	MF5-2605 xl.C	MF5-2605 xl.D	MF5-2605 xl.B	MF5-2605 xl.D	MF5-2605xl.A	MF5-2605 xl.B
Depth m	2605	2605	2605	2605	2605	2605	2605	2605
Comment				low Z	low Z	high Z		high Z
Figure and spot
n =	1	1	2	1	1	2	2	1
Mineral	czo	czo	czo	czo	czo	ep	ep	ep
SiO2 (wt%)	39.16	38.98	38.6	39.22	38.48	38.045	38.4	38.85
TiO2	0.09	0.02	bdl	0.04	0.05	0.03	0.03	0.07
Al2O3	30.38	29.86	28.15	27.68	26.83	27.225	27.03	26.45
FeO*	3.93	5.11	7.06	7.43	7.35	8.03	8.22	8.42
MgO	0.02	0.03	bdl	0.04	0.02	0.025	0.02	0.03
MnO	0.68	1.23	0.35	0.36	0.29	0.29	0.33	0.24
CaO	23.08	22.47	23.65	23.95	23.54	23.655	23.54	23.88
SrO	0.07	0.06	bdl	bdl	bdl	bdl	bdl	0.11
Na2O	bdl	bdl	bdl	bdl	bdl	bdl	bdl	bdl
K2O	bdl	bdl	bdl	bdl	bdl	bdl	bdl	bdl
Y2O3	bdl	bdl	bdl	bdl	bdl	bdl	bdl	bdl
ThO2	bdl	bdl	bdl	bdl	bdl	bdl	bdl	bdl
Total	97.41	97.76	97.82	98.72	96.56	97.31	97.57	98.05
Formulae on the basis of (T+M+A) = 8 cations
Si	3.021	3.008	2.988	3.014	3.024	2.969	2.992	3.017
Ti	0.005	0.001	0	0.002	0.003	0.002	0.002	0.004
Al	2.762	2.716	2.569	2.507	2.485	2.504	2.482	2.421
Fe3+	0.185	0.265	0.455	0.461	0.46	0.5245	0.531	0.537
Fe2+	0.069	0.065	0.002	0.016	0.023	0	0.004	0.01
Mg	0.002	0.003	0	0.005	0.002	0.003	0.002	0.003
Mn	0.044	0.08	0.023	0.023	0.019	0.019	0.022	0.016
Ca	1.908	1.858	1.962	1.972	1.982	1.978	1.965	1.987
Sr	0.003	0.003	0	0	0	0	0	0.005
Na	0	0	0	0	0	0	0	0
K	0	0	0	0	0	0	0	0
Y	0	0	0	0	0	0	0	0
Th	0	0	0	0	0	0	0	0
XFe	0.0627757	0.0888963	0.150463	0.155323	0.156197	0.173188	0.176236	0.181542
FeO* = total iron as Fe2+; bdl = below detection limit; n = number of analyses averaged; XFe = (Fe3+)/(Fe3++Al) apfu; ep = epidote, czo = clinozoisite
Fe3+/Fe2+ calculated on the basis of stoichiometry; Z = average atomic number

## Sheet: SV1
Compositions of epidote and clinozoisite from the SV1 samples.
`
Analysis	SV1-2676-11	SV1-2676-4	SV1-2860.3 xl.A	SV1-2860.9 xl.C	SV1-2860 xl.E	SV1-2125.3 xl.A	SV1-2125.s	SV1-2510 mass	SV1-2125.9 xl.C	SV1-2860 xl.F	SV1-2860 xl.D	SV1-2125.6 xl.B	SV1-2125 xl.D
Depth m	2676	2676	2860	2860	2860	2125	2125	2510	2125	2860	2860	2125	2125
Temperature ºC**	350	350	390	390	390	300	300	335	300	390	390	300	300
Comment							small crystals	xl. mass
Figure and spot
n =	1	1	3	2	3	3	3	4	2	3	5	3	2
Mineral	czo	czo	ep	ep	ep	ep	ep	ep	ep	ep	ep	ep	ep
SiO2 (wt%)	37.71	37.05	37.84	38.14	38.56	37.93	37.83	37.35	38.03	38.5	38.04	37.46	36.555
TiO2	0.16	0.21	0.09	0.335	0.16	0.19	0.45	0.14	0.5	0.04	0.25	0.73	0.25
Al2O3	27.43	26.12	24	23.155	23.36	22.89	22.87	23.92	22.51	23.24	23.12	21.58	20.905
FeO*	5.59	7	11.6	12.56	12.68	12.49	12.35	12.77	12.59	13.04	12.7	13.79	14.175
MgO	bdl	bdl	bdl	bdl	bdl	0.06	0.3	0.29	0.13	bdl	0.02	0.02	0.08
MnO	0.49	0.27	0.24	0.11	0.32	0.34	0.29	0.85	0.36	0.2	0.15	0.38	0.48
CaO	22.24	22.83	23.07	23.12	23.26	22.77	22.77	21.88	22.93	23.21	23.27	22.57	21.875
SrO	0.48	bdl	0.1	bdl	0.07	0.06	bdl	bdl	0.06	0.13	bdl	0.14	0.09
Na2O	0.07	bdl	bdl	bdl	bdl	bdl	bdl	bdl	bdl	bdl	bdl	bdl	bdl
K2O	bdl	0.1	0.02	bdl	bdl	bdl	0.05	bdl	0.02	bdl	0.02	bdl	0.05
Y2O3	0.39	bdl	bdl	bdl	bdl	bdl	bdl	bdl	bdl	bdl	bdl	bdl	bdl
ThO2	bdl	bdl	bdl	bdl	bdl	bdl	bdl	bdl	bdl	bdl	bdl	bdl	bdl
Total	94.56	93.58	96.96	97.42	98.41	96.73	96.91	97.2	97.13	98.36	97.57	96.74	94.46
Formulae on the basis of (T+M+A) = 8 cations
Si	3.026	3.004	3	3.019	3.023	3.025	3.008	2.961	3.024	3.021	3.007	3.008	3.005
Ti	0.01	0.013	0.005	0.02	0.009	0.011	0.027	0.008	0.03	0.002	0.015	0.044	0.015
Al	2.594	2.496	2.243	2.16	2.158	2.152	2.143	2.235	2.11	2.15	2.154	2.043	2.025
Fe3+	0.329	0.475	0.748	0.761	0.777	0.775	0.791	0.827	0.783	0.803	0.805	0.851	0.939
Fe2+	0.046	0	0.021	0.071	0.054	0.058	0.03	0.019	0.054	0.053	0.034	0.076	0.036
Mg	0	0	0	0	0	0.007	0.036	0.034	0.015	0	0.002	0.002	0.01
Mn	0.033	0.019	0.016	0.007	0.021	0.023	0.02	0.057	0.024	0.013	0.01	0.026	0.033
Ca	1.912	1.983	1.96	1.961	1.954	1.946	1.94	1.858	1.954	1.952	1.971	1.942	1.927
Sr	0.022	0	0.005	0	0.003	0.003	0	0	0.003	0.006	0	0.007	0.004
Na	0.011	0	0	0	0	0	0	0	0	0	0	0	0
K	0	0.01	0.002	0	0	0	0.005	0	0.002	0	0.002	0	0.005
Y	0.017	0	0	0	0	0	0	0	0	0	0	0	0
Th	0	0	0	0	0	0	0	0	0	0	0	0	0
XFe	0.112556	0.159879	0.250084	0.260527	0.264736	0.264776	0.269598	0.270085	0.270653	0.271927	0.272051	0.294057	0.316802
FeO* = total iron as Fe2+; bdl = below detection limit; n = number of analyses averaged; XFe = (Fe3+)/(Fe3++Al) apfu; czo = clinozoisite, ep = epidote; Fe3+/Fe2+ calculated on the basis of stoichiometry

## Sheet: SV3 
Compositions of epidote and clinozoisite from the SV3 samples
Analysis	SV3-2353 Tr33	SV3-2353 Tr47	SV3-2353 Tr39	SV3-2353 Tr48	SV3-2353 Tr45-46	SV3-2353#12	SV3-2353 Tr8	SV3-2353 Tr40-44	SV3-2353 Tr32	SV3-2353.17 xl. B	SV3-2353 Tr28	SV3-2353 Tr49	SV3-2359 xl.A	SV3-2353 Tr12	SV3-2353 xl.Ar	SV3-2353.11 xl. B	SV3-2353 Tr27	SV3-2353 Tr37-38	SV3-2353#4	SV3-2353 Tr13	SV3-2353 Tr24-25	SV3-2353 Tr10-11	SV3-2353 Tr31	SV3-2105	SV3-2353 Tr34-36	SV3-2353 Tr20	SV3-2353.16 xl. B	SV3-2353 Tr29	SV3-2353.13xl. B	SV3-2353.14xl. B	SV3-2105 xl.1	SV3-2105 xl.3	SV3-2353 Tr23	SV3-2359 xl.B	SV3-2353.15xl. B	SV3-2359 xl.A	SV3-2353 Tr7	SV3-2353 Tr30	SV3-2105 xl.2	SV3-2353 Tr17-19	SV3-2353 Tr3-5	SV3-2353 Tr26	SV3-2353.12xl. B	SV3-2353#2	SV3-2353 Tr14	SV3-2353 Tr21-22	SV3-2353 Tr2	SV3-2105.H	SV3-2100.S
Depth m	2353	2353	2353	2353	2353	2353	2353	2353	2353	2353	2353	2353	2359	2353	2353	2353	2353	2353	2353	2353	2353	2352	2353	2105	2353	2353	2353	2353	2353	2353	2105	2105	2353	2359	2353	2359	2353	2353	2105	2553	2352	2353	2353	2353	2353	2353	2353	2105	2100
Comment													low Z		low Z rim																					high Z													small xl. in vug
Figure and spot		Fig. 7a-F									Fig. 7c-E				Fig. 7b-B																							Fig. 7c-D
n =	1	1	1	1	2	1	1	5	1	1	1	1	1	1	3	1	1	2	1	1	2	2	1	1	3	1	1	1	1	1	3	3	1	3	1	4	1	1	3	3	2	1	1	1	1	2	1	1	1
Mineral	czo	czo	czo	czo	czo	czo	czo	czo	czo	czo	czo	czo	czo	czo	czo	czo	czo	czo	czo	ep	ep	ep	ep	ep	ep	ep	ep	ep	ep	ep	ep	ep	ep	ep	ep	ep	ep	ep	ep	ep	ep	ep	ep	ep	ep	ep	ep	ep	ep
SiO2 (wt%)	39.58	39.4	39.51	39.32	39.43	38.25	39.45	39.32	39.27	39.34	39.23	38.81	38.4	39.19	38.8067	39.09	39.01	39.065	37.95	38.91	39.035	39.13	38.99	38.41	38.8267	38.76	38.83	38.75	38.97	38.76	38.53	38.73	38.77	38.23	38.7	38.795	38.67	38.8	38.4	38.5233	38.44	38.75	38.53	37.18	38.54	38.57	38.51	37.76	37.73
TiO2	0.05	0.17	0.09	0.14	0.1	bdl	0.06	0.138	0.1	0.13	0.06	0.14	0.05	0.14	bdl	0.03	0.12	0.105	bdl	0.13	0.12	0.095	0.06	bdl	0.12	0.07	0.07	0.17	0.09	0.11	0.03	0.02	0.07	bdl	0.07	0.07	0.08	0.07	0.1	0.0766667	0.015	0.06	0.09	0.11	bdl	0.025	bdl	0.02	0.05
Al2O3	29.89	29.53	29.45	28.62	28.785	29.16	28.53	28.47	28.04	28.09	27.99	27.46	28.17	27.29	27.7233	27.43	27.55	27.56	26.6	26.84	26.91	26.865	26.71	27.28	26.0933	26.27	26.1	25.91	26.12	25.81	26.15	25.45	25.26	25.28	25.43	25.175	25	25.4	24.65	25.0267	24.695	25.06	24.77	24.64	24.25	24.29	24.33	25.57	24.79
FeO*	5.25	5.46	5.61	6.02	6.13	6.01	6.5	6.534	6.89	6.85	7.43	7.37	7.13	7.79	7.35	7.93	7.61	7.82	7.37	8.45	8.56	8.43	8.52	9.5	9.38333	9.25	9.43	9.67	9.78	9.65	9.59	9.86	10.01	9.31	10.43	10.225	10.94	10.43	10.88	10.75	11.05	11.13	10.77	10.41	11.2	11.645	11.62	11.51	11.21
MgO	0.16	0.02	0.13	0.26	0.235	0.11	0.28	0.242	0.18	0.28	0.14	0.08	0.03	0.14	0.16	0.14	0.1	0.145	0.33	0.11	0.115	0.125	0.17	0.34	0.106667	0.11	0.06	0.05	0.09	0.11	0.07	0.03	0.1	0.07	0.16	0.0775	0.04	0.17	0.04	0.126667	0.03	0.1	0.12	0.18	0.04	0.02	bdl	0.36	0.31
MnO	bdl	0.02	bdl	0.12	0.055	0.13	0.02	0.104	0.04	0.12	0.12	0.24	0.28	0.08	0.0766667	0.14	0.07	0.04	0.08	0.08	0.085	0.15	0.18	0.26	0.153333	0.15	0.12	0.14	0.17	0.11	0.11	0.04	0.06	0.18	0.17	0.1225	0.03	0.21	0.2	0.143333	0.04	0.18	0.16	0.2	0.1	0.075	bdl	0.04	0.06
CaO	24	24.01	23.93	23.67	23.8	25.26	23.85	23.824	23.62	23.73	23.61	23.64	23.65	23.65	23.7233	23.46	23.84	23.725	25.71	23.6	23.595	23.695	23.55	22.38	23.3833	23.44	23.55	23.5	23.52	23.55	23.48	23.6	23.42	23.67	23.22	23.69	23.18	23.51	23.04	23.2533	23.105	23.29	23.44	25.04	23.34	23.26	23.37	23.39	22.96
SrO	bdl	bdl	bdl	bdl	bdl	bdl	bdl	bdl	bdl	bdl	bdl	bdl	0.19	bdl	0.15	bdl	bdl	bdl	bdl	bdl	bdl	bdl	bdl	bdl	bdl	bdl	bdl	bdl	bdl	bdl	0.16	bdl	bdl	0.11	0.07	0.145	bdl	bdl	0.12	bdl	bdl	bdl	bdl	bdl	bdl	bdl	bdl	bdl	bdl
Na2O	bdl	bdl	bdl	bdl	bdl	bdl	bdl	bdl	bdl	bdl	bdl	bdl	bdl	bdl	bdl	bdl	bdl	bdl	bdl	bdl	bdl	bdl	bdl	bdl	bdl	bdl	bdl	bdl	bdl	bdl	0.02	bdl	bdl	bdl	0.02	bdl	bdl	bdl	bdl	bdl	bdl	bdl	bdl	bdl	bdl	bdl	bdl	bdl	bdl
K2O	bdl	bdl	bdl	bdl	bdl	bdl	0.02	bdl	bdl	bdl	bdl	bdl	bdl	bdl	bdl	bdl	bdl	bdl	bdl	bdl	bdl	bdl	bdl	bdl	bdl	bdl	bdl	bdl	bdl	bdl	bdl	bdl	bdl	bdl	bdl	bdl	0.04	bdl	bdl	bdl	0.035	bdl	bdl	bdl	bdl	bdl	0.02	bdl	bdl
Y2O3	bdl	bdl	bdl	bdl	bdl	bdl	bdl	bdl	bdl	bdl	bdl	bdl	bdl	bdl	bdl	bdl	bdl	bdl	bdl	bdl	bdl	bdl	bdl	bdl	bdl	bdl	bdl	bdl	bdl	bdl	bdl	bdl	bdl	bdl	bdl	bdl	bdl	bdl	bdl	bdl	bdl	bdl	bdl	bdl	bdl	bdl	bdl	bdl	bdl
ThO2	bdl	bdl	bdl	bdl	bdl	bdl	bdl	bdl	bdl	bdl	bdl	bdl	bdl	bdl	bdl	bdl	bdl	bdl	bdl	bdl	bdl	bdl	bdl	bdl	bdl	bdl	bdl	bdl	bdl	bdl	bdl	bdl	bdl	bdl	bdl	bdl	bdl	bdl	bdl	bdl	bdl	bdl	bdl	bdl	bdl	bdl	bdl	bdl	bdl
Total	98.93	98.61	98.72	98.15	98.535	98.92	98.71	98.632	98.14	98.54	98.58	97.74	97.9	98.28	98	98.22	98.3	98.46	98.04	98.12	98.42	98.49	98.18	98.17	98.0667	98.05	98.16	98.24	98.74	98.1	98.14	97.72	97.69	96.85	98.27	98.3	97.98	98.59	97.43	97.92	97.495	98.57	97.88	97.76	97.47	97.885	97.85	98.65	97.11
Formulae on the basis of (T+M+A) = 8 cations
Si	3.01	3.011	3.015	3.023	3.02	2.915	3.018	3.0124	3.028	3.02	3.015	3.012	2.973	3.027	3.00133	3.02	3.01	3.01	2.931	3.016	3.0165	3.021	3.02	2.977	3.01967	3.013	3.017	3.013	3.013	3.016	2.996	3.027	3.033	3.013	3.012	3.02025	3.024	3.01	3.023	3.01267	3.023	3.013	3.015	2.908	3.033	3.026	3.021	2.928	2.975
Ti	0.003	0.01	0.005	0.008	0.006	0	0.003	0.008	0.006	0.008	0.003	0.008	0.003	0.008	0.000666667	0.002	0.007	0.006	0	0.008	0.007	0.0055	0.003	0	0.007	0.004	0.004	0.01	0.005	0.006	0.002	0.001	0.004	0	0.004	0.00425	0.005	0.004	0.006	0.00433333	0.001	0.004	0.005	0.006	0	0.0015	0	0.001	0.003
Al	2.679	2.66	2.649	2.594	2.598	2.619	2.573	2.5708	2.548	2.541	2.535	2.511	2.57	2.484	2.527	2.498	2.505	2.5025	2.422	2.452	2.451	2.4445	2.438	2.492	2.392	2.407	2.39	2.374	2.38	2.367	2.397	2.345	2.329	2.348	2.333	2.3095	2.304	2.322	2.287	2.30667	2.289	2.296	2.285	2.272	2.25	2.2455	2.25	2.337	2.303
Fe3+	0.295	0.298	0.31	0.343	0.3505	0.383	0.386	0.3882	0.385	0.404	0.427	0.449	0.462	0.447	0.462	0.458	0.461	0.466	0.476	0.502	0.502	0.502	0.514	0.554	0.554667	0.559	0.567	0.579	0.584	0.589	0.611	0.599	0.596	0.614	0.638	0.63875	0.644	0.65	0.654	0.659667	0.667	0.671	0.674	0.681	0.683	0.699	0.71	0.746	0.739
Fe2+	0.039	0.051	0.048	0.044	0.042	0	0.03	0.0304	0.059	0.036	0.051	0.029	0	0.056	0.0136667	0.055	0.03	0.038	0	0.045	0.051	0.0425	0.038	0.062	0.0556667	0.042	0.046	0.05	0.048	0.039	0.013	0.045	0.058	0	0.041	0.02775	0.072	0.026	0.062	0.0433333	0.0595	0.053	0.031	0	0.054	0.065	0.053	0	0
Mg	0.018	0.002	0.015	0.03	0.0265	0.012	0.032	0.0274	0.021	0.032	0.016	0.009	0.003	0.016	0.0183333	0.016	0.012	0.0165	0.038	0.013	0.0135	0.0145	0.02	0.039	0.0123333	0.013	0.007	0.006	0.01	0.013	0.008	0.003	0.012	0.008	0.019	0.00925	0.005	0.02	0.005	0.0146667	0.0035	0.012	0.014	0.021	0.005	0.002	0	0.042	0.036
Mn	0	0.001	0	0.008	0.0035	0.008	0.001	0.0068	0.003	0.008	0.008	0.016	0.018	0.005	0.005	0.009	0.005	0.0025	0.005	0.005	0.0055	0.01	0.012	0.017	0.0103333	0.01	0.008	0.009	0.011	0.007	0.007	0.003	0.004	0.012	0.011	0.00825	0.002	0.014	0.013	0.00966667	0.003	0.012	0.011	0.013	0.007	0.005	0	0.003	0.004
Ca	1.956	1.966	1.957	1.95	1.953	2.062	1.955	1.9556	1.951	1.952	1.944	1.966	1.962	1.957	1.96567	1.942	1.971	1.9585	2.128	1.96	1.9535	1.9605	1.955	1.859	1.94867	1.952	1.961	1.958	1.948	1.963	1.956	1.977	1.963	1.999	1.936	1.976	1.942	1.954	1.944	1.94833	1.947	1.94	1.965	2.099	1.968	1.955	1.965	1.943	1.939
Sr	0	0	0	0	0	0	0	0	0	0	0	0	0.009	0	0.00666667	0	0	0	0	0	0	0	0	0	0	0	0	0	0	0	0.007	0	0	0.005	0.003	0.00625	0	0	0.005	0	0	0	0	0	0	0	0	0	0
Na	0	0	0	0	0	0	0	0	0	0	0	0	0	0	0	0	0	0	0	0	0	0	0	0	0	0	0	0	0	0	0.003	0	0	0	0.003	0	0	0	0	0	0.0015	0	0	0	0	0	0	0	0
K	0	0	0	0	0	0	0.002	0	0	0	0	0	0	0	0	0	0	0	0	0	0	0	0	0	0	0	0	0	0	0	0	0	0	0	0	0	0.004	0	0	0	0.0035	0	0	0	0	0	0.002	0	0
Y	0	0	0	0	0	0	0	0	0	0	0	0	0	0	0	0	0	0	0	0	0	0	0	0	0	0	0	0	0	0	0	0	0	0	0	0	0	0	0	0	0	0	0	0	0	0	0	0	0
Th	0	0	0	0	0	0	0	0	0	0	0	0	0	0	0	0	0	0	0	0	0	0	0	0	0	0	0	0	0	0	0	0	0	0	0	0	0	0	0	0	0	0	0	0	0	0	0	0	0
XFe	0.099193	0.100744	0.104765	0.116786	0.118872	0.127582	0.130449	0.131166	0.131265	0.137182	0.144159	0.151689	0.152375	0.152508	0.154567	0.154939	0.155428	0.156881	0.164251	0.169939	0.17	0.17036	0.174119	0.181878	0.188181	0.188469	0.191748	0.196072	0.197031	0.199256	0.203125	0.203465	0.203761	0.207292	0.214743	0.216654	0.218453	0.218708	0.222373	0.222425	0.225631	0.226154	0.22778	0.230613	0.232867	0.237395	0.239865	0.241972	0.242932
FeO* = total iron as Fe2+; bdl = below detection limit; n = number of analyses averaged; XFe = (Fe3+)/(Fe3++Al) apfu; ep = epidote, czo = clinozoisite; Fe3+/Fe2+ calculated on the basis of stoichiometry; Z = average atomic number
[truncated: 13 more columns]

## Sheet: REE-bearing
Compositions of REE-bearing epidote supergroup from the MF1, MF2, and SV1 samples
	epidote group																	allanite group
Analysis	SV3-2105-1	MF1-1597 xl.E	MF1-1597.23-26	MF2-1582-6	MF2-1824-2 xl.1	MF1-1597-2	MF2-1582c	MF2-1824-101	SV1-2125-1	SV1-2125-2	SV1-2125-3	SV1-2676-1	SV1-2676-2	SV1-2676-6	MF1-1597-3	MF1-1597-13	MF1-1597-14	MF2-1824.1 xl.1	MF2-1824-3 xl.1	MF2-1824 xl.1	MF1-1597-1	MF1-1597-12	MF1-1150a	MF1-1150b	MF2-1715h	MF1-1398c	MF1-1398d	MF1-1398e	MF1-1398f	MF1-1398g	MF1-1495b	MF2-1582a	MF2-1582b	MF2-1582e	MF2-1582f	MF2-1715b	MF2-1715c	MF2-1715d	MF2-1715e	MF2-1715f	MF2-1715g	SV1-2125-4	SV1-2510-1	SV1-2510-3	SV1-2676-7	SV1-2676-8	SV1-2676-9	SV1-2676-12	MF1-1597-11
Depth m	2105	1597	1597	1582	1824	1597	1582	1824	2125	2125	2125	2676	2676	2676	1597	1597	1597	1824	1824	1824	1597	1597	1150	1150	1715	1398	1398	1398	1398	1398	1495	1582	1582	1582	1582	1715	1715	1715	1715	1715	1715	2125	2510	2510	2676	2676	2676	2676	1597
Comment	REE core	REE core	REE core	REE core	zoned with core													zoned with core	zoned with core	core #2
Figure and spot						Fig. 9g-N											Fig. 9g-O				Fig. 9a-L
n =	1	3	2	3	1	1	1	1	1	1	1	1	1	1	1	1	1	1	1	2	1	1	1	1	1	1	1	1	1	1	1	1	1	1	1	1	1	1	1	1	1	1	1	1	1	1	1	1	1
Mineral	czo	czo	ep	ep	ep	ep	ep	ep	ep	ep	ep	czo	czo	czo	ep	czo	czo	aln-Ce	aln-Ce	aln-Ce	aln-Ce	aln-Ce	aln-Ce	aln-Ce	aln-Ce	aln-Ce	aln-Ce	aln-Ce	aln-Ce	aln-Ce	aln-Ce	aln-Ce	aln-Ce	aln-Ce	aln-Ce	aln-Ce	aln-Ce	aln-Ce	aln-Ce	aln-Ce	aln-Ce	aln-Ce	aln-Ce	aln-Ce	aln-Ce	aln-Ce	aln-Ce	aln-Ce	faln-Ce
SiO2 (wt%)	35.68	37.11	35.6	36.34	35.89	36.96	35.13	33.51	34.09	33.13	34.08	35.13	36.43	37.71	37.16	35.72	35.38	33.78	34.18	33.98	33.54	31.26	33.12	33.46	32.54	33.34	34.07	33.85	33.29	33.83	32.82	33.11	33.47	33.31	33.32	33.2	32.33	32.24	31.63	34.5	33.32	31.97	32.07	31.32	33.05	30.58	31.52	30.47	30.01
TiO2	0.1	0.11	0.05	0.38	0.47	0.11	0.33	bdl	0.25	0.14	bdl	0.38	0.47	0.11	0.19	0.13	0.18	0.77	0.82	0.795	0.16	0.08	bdl	bdl	0.61	0.62	0.29	0.44	0.42	0.3	0.46	0.63	0.58	0.82	0.6	bdl	bdl	bdl	bdl	0.24	0.64	bdl	bdl	0.49	0.41	0.18	0.26	0.67	0.13
Al2O3	23.25	26.69	25.35	21.81	21.97	26.05	20.73	21.03	19.39	18.53	16.16	22.8	24.03	26.65	20.68	25.17	24.69	20.92	19.63	20.275	14.76	13.83	21.94	21.58	19.07	19.56	19.28	20.69	19.9	19.74	19.26	18.4	18.98	19.03	18.83	19.57	18.07	19.08	17.49	21.02	18.35	16.77	18.09	17.2	21.74	16.13	16.95	13.27	6.27
FeO*	9.39	6.42	7.56	10.36	11.23	9.4	11.23	10.39	12.04	12.14	16.07	7.96	7.74	7.33	14.65	7.74	7.34	10.01	11	10.505	17.53	16.31	8.24	7.84	10.53	10.49	11.14	10.14	10.45	10.75	10.58	11.13	10.96	11.38	11.53	11.2	12.35	10.82	11.76	10.77	11.53	12.64	11.81	11.88	7.68	11.34	10.96	14.75	24.64
MgO	0.15	0.22	0.25	0.23	0.07	0.09	0.33	bdl	0.09	0.09	0.2	0.24	0.26	bdl	0.22	0.27	0.28	0.11	0.14	0.125	0.57	0.86	bdl	bdl	0.18	bdl	0.25	0.2	0.15	0.19	bdl	0.35	0.29	bdl	0.35	bdl	bdl	0.28	bdl	bdl	0.3	0.08	0.12	0.12	0.24	0.58	0.71	0.75	0.68
MnO	bdl	1.11	1.18	0.89	0.61	1.08	1.12	1.12	0.55	0.53	0.53	0.84	0.79	0.33	0.6	1.14	1.33	1.18	0.85	1.015	1.21	1.38	1.64	1.7	0.85	1.41	0.99	1.17	1.22	1.13	1.26	1.13	1.36	1.23	0.99	0.67	0.76	1.19	0.95	1.28	1.07	0.58	0.56	0.52	0.47	0.99	0.92	bdl	1.13
CaO	17.79	19.36	20.54	16.85	17.78	21.75	15.62	16.28	16.29	15.81	16.1	17.43	18.95	19.84	20.52	18.64	17.25	13.4	13.37	13.385	15	10.7	14.51	13.72	11.97	13.36	12.56	13.35	12.82	12.74	12.68	13.27	13.69	13.61	13.09	12.86	13.97	12.81	13.57	14.9	13.49	13.99	12.85	12.14	14.47	10.57	10.49	9.43	10.03
SrO	bdl	0.09	0.09	1.07	0.66	bdl	1.59	1.19	0.24	0.24	0.34	0.42	0.42	0.41	bdl	bdl	bdl	0.91	0.5	0.705	bdl	bdl	bdl	bdl	0.68	0.89	0.95	1.18	1.2	1.08	0.53	1.16	1.1	1.41	1.33	1.02	bdl	bdl	0.12	1.34	0.26	0.19	0.41	0.39	0.23	0.32	0.19	0.22	bdl
Na2O	0.03	bdl	bdl	0.11	bdl	bdl	bdl	bdl	bdl	0.27	0.18	bdl	bdl	bdl	bdl	bdl	bdl	0.03	0.02	0.025	bdl	bdl	bdl	bdl	bdl	bdl	bdl	bdl	bdl	bdl	bdl	bdl	bdl	bdl	bdl	bdl	bdl	bdl	bdl	bdl	bdl	0.13	0.11	0.19	0.1	0.17	0.3	0.14	bdl
K2O	0.02	bdl	bdl	0.18	bdl	bdl	0.13	bdl	bdl	bdl	bdl	0.11	0.21	bdl	bdl	bdl	bdl	bdl	bdl	bdl	bdl	bdl	bdl	0.15	bdl	bdl	bdl	bdl	bdl	bdl	bdl	bdl	0.19	bdl	bdl	bdl	bdl	bdl	bdl	bdl	0.11	bdl	0.2	bdl	bdl	0.1	bdl	bdl	bdl
La2O3	2.87	2.34	1.84	2.53	2.71	0.21	4.08	2.53	3.94	4.37	2.82	3.02	1.82	1.62	2.12	2.95	4.12	4.2	4.35	4.275	4.14	6.15	7.91	7.84	5.41	4.71	5.26	4.79	4.6	4.9	5.46	4.82	4.57	4.88	5.33	4.97	5.36	4.23	4.58	3.98	4.68	4.73	4.65	6.27	4.94	7.99	7.58	8.3	6.36
Ce2O3	5.05	3.2	2.77	3.84	4.62	0.56	5.67	5.21	5.69	6.23	5.21	4.5	3.09	2.99	3.34	4.59	6.31	8.27	9.8	9.035	8.86	13.05	9.33	9.48	10.27	8.33	9.61	8.81	9.3	9.61	10.66	8.59	8.37	8.53	8.95	9.87	8.18	9.56	8.9	7.11	9.24	8.54	8.82	9.84	8.45	11.01	10.79	12.21	12.76
Pr2O3	na	na	na	na	bdl	bdl	0.42	bdl	0.37	0.4	0.51	0.35	0.25	0.33	0.16	0.32	0.66	bdl	bdl	bdl	0.54	0.89	0.56	0.68	0.85	0.81	0.74	1.01	0.94	1.01	0.97	0.7	0.9	0.79	0.75	1.05	bdl	1.09	bdl	0.74	0.78	0.66	1.01	0.63	0.73	1.13	0.95	1.14	1.33
Nd2O3	1.69	0.4	na	0.74	1.1	0.24	1.4	1.44	1.07	1.01	1.84	1.04	1.08	1.16	1	1.26	1.27	1.85	2.23	2.04	2.36	3.69	1.05	1.25	2.88	2.78	2.66	2.98	3.36	3.48	2.77	2.43	2.64	2.4	2.45	2.49	1.94	3.13	2.27	2.4	2.66	1.6	2.84	2.3	1.86	2.78	2.98	2.8	3.81
Sm2O3	na	na	na	na	na	na	0.33	bdl	0.24	0.15	0.42	bdl	0.21	0.19	na	na	na	bdl	bdl	bdl	0.21	0.23	bdl	0.3	0.49	0.35	0.61	0.46	0.59	0.61	0.52	0.25	0.43	0.47	0.28	0.27	0.18	0.53	0.11	0.34	0.11	0.15	0.61	0.12	0.16	0.45	0.42	0.22	0.26
Eu2O3	na	na	na	na	na	na	0.15	bdl	bdl	bdl	bdl	bdl	bdl	0.14	na	na	na	na	na	bdl	0.16	0.12	bdl	bdl	0.19	bdl	0.17	bdl	bdl	0.15	bdl	bdl	bdl	0.12	bdl	0.21	0.17	bdl	0.17	0.23	0.12	bdl	bdl	bdl	bdl	bdl	bdl	bdl	0.31
Gd2O3	na	na	na	na	na	na	0.1	bdl	0.11	bdl	0.29	bdl	bdl	bdl	na	na	na	na	na	na	bdl	bdl	bdl	bdl	0.33	0.16	0.37	0.32	0.21	0.3	0.24	0.13	0.26	0.14	bdl	0.25	0.13	0.1	0.13	0.28	0.28	bdl	0.16	bdl	bdl	0.35	0.15	bdl	0.1
Y2O3	0.22	bdl	bdl	bdl	bdl	0.08	bdl	bdl	bdl	bdl	1.08	0.26	0.29	0.5	bdl	bdl	bdl	bdl	bdl	bdl	0.08	0.19	bdl	bdl	bdl	bdl	bdl	bdl	bdl	bdl	bdl	bdl	bdl	bdl	bdl	bdl	bdl	bdl	bdl	bdl	bdl	bdl	0.15	0.2	0.11	0.17	bdl	bdl	0.14
ThO2	0.73	bdl	bdl	bdl	0.17	bdl	bdl	bdl	bdl	bdl	bdl	bdl	bdl	bdl	0.12	bdl	bdl	bdl	0.09	0.09	0.09	0.19	bdl	bdl	bdl	bdl	bdl	bdl	bdl	bdl	bdl	bdl	bdl	bdl	bdl	bdl	bdl	bdl	bdl	bdl	bdl	bdl	bdl	bdl	bdl	bdl	bdl	bdl	0.09
Total	96.97	97.05	95.23	95.33	97.28	96.53	98.36	92.7	94.36	93.04	95.83	94.48	96.04	99.31	100.76	97.93	98.81	95.43	96.98	96.25	99.21	98.93	98.3	98	96.85	96.81	98.95	99.39	98.45	99.82	98.21	96.1	97.79	98.12	97.89	97.63	93.44	95.06	91.68	99.13	96.94	92.03	94.46	93.61	94.64	94.84	95.17	94.37	98.05
ΣREE+Y	9.83	5.94	4.61	7.11	8.43	1.09	12.15	9.18	11.42	12.16	12.17	9.17	6.74	6.93	6.62	9.12	12.36	14.32	16.38	15.35	16.35	24.32	18.85	19.55	20.42	17.14	19.42	18.37	19	20.06	20.62	16.92	17.17	17.33	17.76	19.11	15.96	18.64	16.16	15.08	17.87	15.68	18.24	19.36	16.25	23.88	22.87	24.67	25.07
ΣREE+Y+Th+Sr	10.56	6.03	4.7	8.18	9.26	1.09	13.74	10.37	11.66	12.4	12.51	9.59	7.16	7.34	6.74	9.12	12.36	15.23	16.97	16.14	16.44	24.51	18.85	19.55	21.1	18.03	20.37	19.55	20.2	21.14	21.15	18.08	18.27	18.74	19.09	20.13	15.96	18.64	16.28	16.42	18.13	15.87	18.65	19.75	16.48	24.2	23.06	24.89	25.16
Formulae on the basis of (T+M+A) = 8 cations
Si	3.031	3.021	2.937	3.099	3.032	2.946	3.025	2.998	3.045	3.017	3.039	3.039	3.037	3.025	2.997	2.957	2.97	3.046	3.082	3.064	2.993	2.973	2.953	3.01	3.03	3.034	3.076	3.008	3.013	3.037	3.011	3.04	3.014	3.007	3.017	3.034	3.029	3.009	3.034	3.007	3.04	3.045	3.016	3.01	3.006	2.997	3.039	3.063	3.001
Ti	0.006	0.007	0.003	0.024	0.03	0.007	0.021	0	0.017	0.01	0	0.025	0.029	0.007	0.012	0.008	0.011	0.052	0.056	0.054	0.011	0.006	0	0	0.043	0.042	0.02	0.029	0.029	0.02	0.032	0.044	0.039	0.056	0.041	0	0	0	0	0.016	0.044	0	0	0.035	0.028	0.013	0.019	0.051	0.01
Al	2.328	2.561	2.465	2.192	2.187	2.447	2.104	2.217	2.041	1.988	1.698	2.325	2.361	2.52	1.966	2.456	2.443	2.223	2.086	2.155	1.552	1.55	2.306	2.288	2.093	2.098	2.051	2.167	2.122	2.088	2.083	1.991	2.015	2.024	2.009	2.108	1.995	2.099	1.978	2.16	1.973	1.882	2.005	1.948	2.331	1.863	1.926	1.572	0.739
Fe3+	0.268	0.205	0.515	0.362	0.423	0.615	0.435	0.487	0.463	0.602	0.844	0.266	0.319	0.207	0.818	0.337	0.215	0.114	0.731	0.686	0.904	0.638	0.171	0.066	0.07	0.18	0.721	0.162	0.169	0.143	0.141	0.274	0.337	0.281	0.299	0.187	0.401	0.25	0.388	0.316	0.277	0.506	0.38	0.311	0.076	0.304	0.21	0.918	1.058
Fe2+	0.399	0.232	0.007	0.377	0.371	0.011	0.373	0.291	0.437	0.323	0.354	0.31	0.221	0.285	0.17	0.199	0.3	0.64	0.099	0.107	0.404	0.659	0.443	0.523	0.75	0.618	0.12	0.591	0.621	0.664	0.67	0.581	0.489	0.578	0.574	0.669	0.566	0.595	0.556	0.469	0.602	0.5	0.549	0.644	0.508	0.626	0.674	0.322	0.741
Mg	0.019	0.027	0.031	0.029	0.009	0.011	0.042	0	0.012	0.012	0.027	0.031	0.032	0	0.026	0.033	0.035	0.015	0.019	0.017	0.076	0.122	0	0	0.025	0	0.034	0.026	0.02	0.025	0	0.048	0.039	0	0.047	0	0	0.039	0	0	0.041	0.011	0.017	0.017	0.033	0.085	0.102	0.112	0.101
Mn	0	0.077	0.082	0.064	0.044	0.073	0.082	0.085	0.042	0.041	0.04	0.062	0.056	0.022	0.041	0.08	0.095	0.09	0.065	0.078	0.091	0.111	0.124	0.13	0.067	0.109	0.076	0.088	0.094	0.086	0.098	0.088	0.104	0.094	0.076	0.052	0.06	0.094	0.077	0.095	0.083	0.047	0.045	0.042	0.036	0.082	0.075	0	0.096
Ca	1.619	1.689	1.816	1.54	1.609	1.857	1.441	1.561	1.559	1.542	1.538	1.616	1.693	1.706	1.773	1.653	1.551	1.294	1.292	1.293	1.434	1.09	1.386	1.322	1.194	1.303	1.215	1.271	1.243	1.225	1.247	1.306	1.321	1.316	1.27	1.259	1.402	1.281	1.395	1.392	1.319	1.428	1.295	1.25	1.41	1.11	1.084	1.016	1.075
Sr	0	0.004	0.004	0.053	0.032	0	0.079	0.062	0.012	0.013	0.018	0.021	0.02	0.019	0	0	0	0.048	0.026	0.037	0	0	0	0	0.037	0.047	0.05	0.061	0.063	0.056	0.028	0.062	0.057	0.074	0.07	0.054	0	0	0.007	0.068	0.014	0.01	0.022	0.022	0.012	0.018	0.011	0.013	0
Na	0.005	0	0	0.018	0	0	0	0	0	0.048	0.031	0	0	0	0	0	0	0.005	0.003	0.004	0	0	0	0	0	0	0	0	0	0	0	0	0	0	0	0	0	0	0	0	0	0.024	0.02	0.035	0.018	0.032	0.056	0.027	0
K	0.002	0	0	0.02	0	0	0.014	0	0	0	0	0.012	0.022	0	0	0	0	0	0	0	0	0	0	0.017	0	0	0	0	0	0	0	0	0.022	0	0.01	0	0	0	0	0	0.013	0	0.024	0	0	0.013	0	0	0
La	0.09	0.07	0.056	0.08	0.084	0.006	0.13	0.083	0.13	0.147	0.093	0.096	0.056	0.048	0.063	0.09	0.128	0.14	0.145	0.142	0.136	0.216	0.26	0.26	0.186	0.158	0.175	0.157	0.154	0.162	0.185	0.163	0.152	0.162	0.178	0.168	0.185	0.146	0.162	0.128	0.157	0.166	0.161	0.222	0.166	0.289	0.27	0.308	0.235
Ce	0.157	0.095	0.084	0.12	0.143	0.016	0.179	0.171	0.186	0.208	0.17	0.143	0.094	0.088	0.099	0.139	0.194	0.273	0.324	0.298	0.289	0.454	0.305	0.312	0.35	0.278	0.318	0.287	0.308	0.316	0.358	0.289	0.276	0.282	0.297	0.33	0.281	0.327	0.313	0.227	0.309	0.298	0.304	0.346	0.281	0.395	0.381	0.449	0.467
Pr	0	0	0	0	0	0	0.013	0	0.012	0.013	0.017	0.011	0.008	0.01	0.005	0.01	0.02	0	0	0	0.018	0.031	0.018	0.022	0.029	0.027	0.024	0.033	0.031	0.033	0.032	0.023	0.03	0.026	0.025	0.035	0	0.037	0	0.024	0.026	0.023	0.035	0.022	0.024	0.04	0.033	0.042	0.048
Nd	0.051	0.012	0	0.023	0.033	0.007	0.043	0.046	0.034	0.033	0.059	0.032	0.032	0.033	0.029	0.037	0.038	0.06	0.072	0.066	0.075	0.125	0.033	0.04	0.096	0.09	0.086	0.095	0.109	0.112	0.091	0.08	0.085	0.077	0.079	0.081	0.065	0.104	0.078	0.075	0.087	0.054	0.095	0.079	0.06	0.097	0.103	0.101	0.136
Sm	0	0	0	0	0	0	0.01	0	0.007	0.005	0.013	0	0.006	0.005	0	0	0	0	0	0	0.006	0.008	0	0.009	0.016	0.011	0.019	0.014	0.018	0.019	0.016	0.008	0.013	0.015	0.009	0.009	0.006	0.017	0.004	0.01	0.003	0.005	0.02	0.004	0.005	0.015	0.014	0.008	0.009
Eu	0	0	0	0	0	0	0.004	0	0	0	0	0	0	0.004	0	0	0	0	0	0	0.005	0.003	0	0	0.006	0	0.005	0	0	0.005	0	0	0	0.004	0	0.007	0.005	0	0.006	0.007	0.004	0	0	0	0	0	0	0	0.011
Gd	0	0	0	0	0	0	0.003	0	0.003	0	0.009	0	0	0	0	0	0	0	0	0	0	0	0	0	0.01	0.005	0.011	0.009	0.006	0.009	0.007	0.004	0.008	0.004	0	0.008	0.004	0.003	0.004	0.008	0.008	0	0.005	0	0	0.011	0.005	0	0.003
Y	0.01	0	0	0	0	0.003	0	0	0	0	0.051	0.012	0.013	0.021	0	0	0	0	0	0	0.004	0.01	0	0	0	0	0	0	0	0	0	0	0	0	0	0	0	0	0	0	0	0	0.008	0.01	0.005	0.009	0	0	0.007
Th	0.014	0	0	0	0.003	0	0	0	0	0	0	0	0	0	0.002	0	0	0	0.002	0.001	0.002	0.004	0	0	0	0	0	0	0	0	0	0	0	0	0	0	0	0	0	0	0	0	0	0	0	0	0	0	0.002
ΣREE+Y	0.308	0.177	0.14	0.223	0.26	0.032	0.382	0.3	0.372	0.406	0.412	0.294	0.209	0.209	0.196	0.276	0.38	0.473	0.541	0.506	0.533	0.847	0.616	0.643	0.693	0.569	0.638	0.595	0.626	0.656	0.689	0.567	0.564	0.57	0.588	0.638	0.546	0.634	0.567	0.479	0.594	0.546	0.628	0.683	0.541	0.856	0.806	0.908	0.916
ΣREE+Y+Th+Sr	0.322	0.181	0.144	0.276	0.295	0.032	0.461	0.362	0.384	0.419	0.43	0.315	0.229	0.228	0.198	0.276	0.38	0.521	0.569	0.545	0.535	0.851	0.616	0.644	0.73	0.616	0.688	0.656	0.689	0.712	0.717	0.629	0.621	0.644	0.658	0.692	0.546	0.634	0.574	0.547	0.608	0.556	0.65	0.705	0.553	0.874	0.817	0.921	0.918
FeO* = total iron as Fe2+; n = number of analyses averaged; bdl = below detection limit; na = not analyzed; Tb–Lu = not analyzed
aln-Ce = allanite-(Ce); faln-Ce = ferriallanite-(Ce); ep = epidote; czo = clinozoisite; Fe3+/Fe2+ calculated on the basis of stoichiometry
[truncated: 9 more columns]
